# Supplementary material for: Aphid alarm pheromone mimicry in transgenic Chrysanthemum morifolium: insights into the potential of (E)-β-farnesene for aphid resistance
Source: Front Plant Sci. 2024 Apr 22;15:1373669. doi: 10.3389/fpls.2024.1373669 (PMC11070518; doi:10.3389/fpls.2024.1373669)
Supplement: Supplementary file 2 [file Table_1.xlsx]

## Sheet: terpenes of flowers
					Flower stem			Flower heads （S2）
Compound	CAS	Formula	RT	KI	1581-WT	PEE-2	PEE-8	1581-WT	PEE-2	PEE-8
α-Thujene	2867 - 05 - 2	C10H16	5.8	943.355	0.16±0.04	0.04±0.01	0.21±0.03	8.72±0.83	7.91±3.04	12.02±1.37
α-Pinene	80 - 56 - 8	C10H16	5.925	950.085	3.53±0.55	4.53±0.78	6.7±0.89	43.45±0.56	47.42±4.59	40.71±4.68
Camphene	79 - 92 - 5	C10H16	6.195	964.799	0±0	0.09±0.02	0.29±0.22	0.3±0.01	0.41±0.04	0.31±0.05
Sabinene	3387 - 41 - 5	C10H16	6.54	983.949	0.09±0.01	0±0	0.27±0.13	0.27±0.08	0.27±0.22	0.76±0.04
β-Pinene	127 - 91 - 3	C10H16	6.635	989.292	2.19±0.31	1.16±0.21	3.21±0.68	1.57±0.07	1.46±0.27	2.5±0.43
Myrcene	123 - 35 - 3	C10H16	6.755	996.082	0.35±0.07	0.2±0.03	0.78±0.19	13.24±0.16	9.65±0.59	12.36±1.42
α-Phellandrene	99 - 83 - 2	C10H16	7.065	1013.84	0.45±0.11	1.27±0.15	0.99±0.12	3.01±0.29	5.69±0.64	1.93±0.07
2-Carene	554 - 61 - 0	C10H16	7.235	1023.72	0.16±0.03	0.65±0.09	0.55±0.1	1.26±0.16	3.09±0.54	0.97±0.14
Unknown	-	-	7.402	1033.51	0.46±0.1	0.21±0.02	0.18±0.1	0.21±0.02	0.32±0.07	0.19±0.02
β-Phellandrene	555 - 10 - 2	C10H16	7.47	1037.52	0.31±0.11	1.18±0.11	1.33±0.12	4.65±0.29	7.01±0.78	3.83±0.37
1,8-Cineole	470 - 82 - 6	C10H18O	7.505	1039.6	1.35±0.05	2.3±0.24	1.99±0.28	-	-	-
γ-Terpinene	99 - 85 - 4	C10H16	7.88	1062.05	0.17±0.02	0.23±0.02	0.42±0.19	1.04±0.07	1.83±0.23	0.76±0.14
(+)-4-Carene	29050 - 33 - 7	C10H16	8.318	1088.86	0±0	0.08±0.02	0.2±0.12	0.16±0.02	0.55±0.17	0.19±0.05
Unknown	-	-	8.566	1104.32	0.12±0.01	0.05±0.01	0.03±0.01	-	-	-
Unknown	-	-	8.82	1120.37	0.83±0.13	1.68±0.19	0.75±0.15	1.8±0.09	1.57±0.12	1.12±0.09
Unknown	-	-	8.93	1127.38	0.46±0.1	0.41±0.06	0.17±0.04	0.7±0.13	1.04±0.36	0.41±0.03
1,7-Octadien-3-one, 2-methyl-6-methylene-	41702 - 60 - 7	C10H14O	9.087	1137.46	0.34±0	0.21±0.02	0.11±0.04	-	-	-
Unknown	-	-	9.329	1153.16	0.43±0.06	0.39±0.05	0.18±0.03	0.98±0.16	0.95±0.27	0.6±0.02
Unknown	-	-	9.517	1165.48	0.28±0.02	0.19±0.02	0.09±0.03	0.44±0.01	0.33±0.01	0.05±0.01
Unknown	-	-	9.834	1186.53	0.22±0.03	0.15±0.03	0.05±0.02	0.26±0.07	0.2±0.08	0.06±0.02
Unknown	-	-	10.031	1199.78	0.43±0.02	0.87±0.12	0.26±0.07	1.98±0.35	1.6±0.06	0.61±0.01
Unknown	-	-	10.391	1224.32	0.34±0.05	0.35±0.05	0.11±0.03	1.4±0.09	1.46±0.08	0.28±0.01
Unknown	-	-	10.484	1230.73	0.44±0.02	0.67±0.09	0.17±0.03	1.1±0.08	1.68±0.44	0.42±0.02
α-Longipinene	5989-08-2	C15H24	12.305	1361.97	0.18±0.04	0.2±0.03	0.22±0.08	0.07±0	0.06±0.01	0.02±0
α-Copaene	3856 - 25 - 5	C15H24	12.614	1385.32	0.02±0	0.02±0	0.03±0	0.02±0	0.04±0.01	0.07±0.01
β-Caryophyllene	87 - 44 - 5	C15H24	13.235	1433.2	0.37±0.08	0.36±0.08	0.77±0.15	0.89±0.04	0.72±0.2	1.05±0.13
α-Bergamotene	17699 - 05 - 7	C15H24	13.33	1440.64	0.04±0	0.1±0.01	0.14±0.01	0.14±0.01	0.13±0.02	0.19±0.03
(E)-β-Farnesene	18794 - 84 - 8	C15H24	13.5	1454.02	4±0.58	4.92±1.08	6.46±1.32	4.69±0.08	3.69±0.74	5.18±0.62
Unknown	-	-	13.63	1464.32	0.72±0.12	0.64±0.12	0.19±0.03	1.09±0.17	1.62±0.62	0.46±0.08
α-Humulene	6753 - 98 - 6	C15H24	13.7	1469.89	0.04±0.02	0.17±0.05	0.26±0.07	2.13±0.55	3.08±0.18	1.21±0.26
γ-Muurolene	30021 - 74 - 0	C15H24	13.899	1485.8	0.06±0.01	0.17±0.03	0.13±0.03	1.34±0.06	2.43±0.13	1.04±0.23
(Z,E)-α-Farnesene	26560 - 14 - 5	C15H24	13.973	1491.76	0.8±0.09	1.57±0.29	1.18±0.2	2.63±0.07	2.47±0.4	4.26±0.42
α-Zingiberene	495 - 60 - 3	C15H24	14.088	1501.04	0.16±0.04	0.24±0.07	0.24±0.05	1.21±0.09	0.9±0.23	0.99±0.16
α-Farnesene	502 - 61 - 4	C15H24	14.158	1506.72	0.37±0.04	0.49±0.12	0.74±0.17	0.8±0.03	0.82±0.05	1.35±0.22
Unknown	-	-	14.195	1509.72	0±0	0.08±0.01	0.06±0.01	0.09±0.01	0.16±0.02	0.18±0.07
β-Bisabolene	495 - 61 - 4	C15H24	14.253	1514.44	0.04±0.01	0.08±0.02	0.1±0	0.59±0.02	0.65±0.08	0.55±0.08
β-Sesquiphellandrene	20307 - 83 - 9	C15H24	14.465	1531.79	1.27±0.15	0.83±0.22	1.11±0.4	4.02±0.26	2.01±0.69	3.57±0.03
Unknown	-	-	14.645	1546.64	0.15±0.04	0.27±0.05	0.21±0.02	0.73±0.05	0.85±0.1	0.76±0.13
Unknown	-	-	15.261	1598.25	0.1±0.02	0.1±0.02	0.1±0.02	0.18±0	0.15±0.03	0.26±0.01
Unknown	-	-	15.712	1636.83	1.41±0.38	1.24±0.28	0.35±0.12	0.28±0.09	0.25±0.1	0.1±0.02
Benzene, (1-propyloctyl)-	4536 - 86 - 1	C17H28	15.83	1647.03	0±0	0.06±0.01	0.02±0	-	-	-
Unknown	-	-	16.165	1676.26	0.37±0.06	0.2±0.05	0.16±0.06	0.39±0.07	0.21±0.04	0.26±0.09
Unknown	-	-	16.686	1722.44	0.56±0.1	0.18±0.03	0.06±0	0.22±0.05	0.3±0.07	0.17±0.01
Unknown	-	-	17.082	1758.13	0.18±0.06	0.15±0.03	0.05±0.01	-	-	-
Unknown	-	-	17.457	1792.42	0.83±0.17	0.34±0.04	0.04±0.01	-	-	-
Unknown	-	-	17.693	1814.23	0.17±0.04	0.08±0.01	0.02±0	-	-	-
Diisobutyl phthalate	84 - 69 - 5	C16H22O4	18.2	1861.71	1.33±0.45	1.24±0.21	0.63±0.13	-	-	-
Unknown	-	-	18.94	1932.52	0.24±0.02	0.25±0.03	0.05±0.02	2.36±0.05	1.55±0.45	1.44±0.03
Dibutyl phthalate	84 - 74 - 2	C16H22O4	19.168	1954.71	0.97±0.32	0.84±0.13	0.37±0.05	-	-	-
1RT, retention time (min); 2RI, retention indices.
